# Supplementary material for: Mapping RANKL- and OPG-expressing cells in bone tissue: the bone surface cells as activators of osteoclastogenesis and promoters of the denosumab rebound effect
Source: PubMed Central journal article supplement (PMC11489716; doi:10.1038/s41413-024-00362-4), 2024-10-18
Supplement: 41413_2024_362_MOESM2_ESM.pdf [file 41413_2024_362_MOESM2_ESM.pdf]

Table S1

| <b>TNFSF11</b>   |         |                   |                  |                |                           |
|------------------|---------|-------------------|------------------|----------------|---------------------------|
| <b>Test</b>      |         | <b>Odds ratio</b> | <b>Std. err.</b> | <b>P value</b> | <b>95% conf. Interval</b> |
| RV.Cs            | Lum. Cs | 1.26454           | 0.336379         | 0.378          | [0.7507677-2.129903]      |
| RV.Cs            | ECs     | 0.3288762         | 0.336379         | 0.018          | [0.1308418-0.8266439]     |
| RV.Cs            | Ocy     | 0.0724326         | 0.0406126        | 0.000          | [0.0241362-0.2173692]     |
| RV.Cs            | Lum.Cs  | 1.746248          | 0.5151597        | 0.059          | [0.979475-3.113282]       |
| RV.Cs            | ECs     | 0.2464438         | 0.1913465        | 0.071          | [0.0538045-1.1288]        |
| RV.Cs            | Ocy     | 0.1243821         | 0.0350191        | 0.000          | [0.0716319-0.2159777]     |
| RV.Cs            | OBs     | 0.4416937         | 0.1180455        | 0.002          | [0.2615966-0.7457795]     |
| RV.Cs            | BLCs    | 0.0579029         | 0.0218793        | 0.000          | [0.0276098-0.1214331]     |
| Lum.Cs           | ECs     | 0.2639473         | 0.1114434        | 0.002          | [0.1153783-0.6038236]     |
| Lum.Cs           | Ocy     | 0.0576148         | 0.0299759        | 0.000          | [0.0207812-0.1597342]     |
| Lum.Cs           | Lum.Cs  | 1.370157          | 0.287042         | 0.133          | [0.9087562-2.065825]      |
| Lum.Cs           | ECs     | 0.1947344         | 0.145626         | 0.029          | [0.0449675-0.8433091]     |
| Lum.Cs           | Ocy     | 0.0987696         | 0.0186564        | 0.000          | [0.068209-0.1430227]      |
| Lum.Cs           | OBs     | 0.350422          | 0.058545         | 0.000          | [0.2525696-0.486185]      |
| Lum.Cs           | BLCs    | 0.0454299         | 0.0143204        | 0.000          | [0.0244922-0.0842668]     |
| ECs              | Ocy     | 0.2256335         | 0.1464749        | 0.022          | [0.0632161-0.8053407]     |
| ECs              | Lum.Cs  | 5.494642          | 2.464857         | 0.000          | [2.280848-13.23678]       |
| ECs              | ECs     | 0.7704825         | 0.6507584        | 0.758          | [0.147173-4.033642]       |
| ECs              | Ocy     | 0.3843331         | 0.1654214        | 0.026          | [0.165326-0.8934591]      |
| ECs              | OBs     | 1.408928          | 0.6065668        | 0.426          | [0.6059436-3.276009]      |
| ECs              | BLCs    | 0.179937          | 0.0906018        | 0.001          | [0.0670693-0.4827444]     |
| Ocy              | Lum.Cs  | 24.10387          | 12.95275         | 0.000          | [8.407654-69.10332]       |
| Ocy              | ECs     | 3.398891          | 3.04619          | 0.172          | [0.5867652-19.68838]      |
| Ocy              | Ocy     | 1.706046          | 0.9008775        | 0.312          | [0.6060574-4.802503]      |
| Ocy              | OBs     | 6.194189          | 3.243476         | 0.000          | [2.219566-17.28625]       |
| Ocy              | BLCs    | 0.7923106         | 0.4643061        | 0.691          | [0.251234-2.498691]       |
| Lum.Cs           | ECs     | 0.1428627         | 0.1083057        | 0.010          | [0.0323306-0.6312827]     |
| Lum.Cs           | Ocy     | 0.0728135         | 0.0164472        | 0.000          | [0.0467673-0.1133657]     |
| Lum.Cs           | OBs     | 0.2572151         | 0.0535935        | 0.000          | [0.1709778-0.3869487]     |
| Lum.Cs           | BLCs    | 0.0331994         | 0.0112255        | 0.000          | [0.0171127-0.0644084]     |
| ECs              | Ocy     | 0.4959857         | 0.3742477        | 0.353          | [0.1130296-2.176437]      |
| ECs              | OBs     | 1.929688          | 1.449975         | 0.382          | [0.4424772-8.415566]      |
| ECs              | BLCs    | 0.2322987         | 0.1848443        | 0.067          | [0.0488349-1.105002]      |
| Ocy              | OBs     | 3.887865          | 0.7775256        | 0.000          | [2.627128-5.753619]       |
| Ocy              | BLCs    | 0.4690561         | 0.1547334        | 0.022          | [0.2457131-0.8954087]     |
| OBs              | BLCs    | 0.1122159         | 0.0363349        | 0.000          | [0.0594895-0.2116747]     |
| <b>TNFRSF11B</b> |         |                   |                  |                |                           |
| <b>Test</b>      |         | <b>Odds ratio</b> | <b>Std. err.</b> | <b>P value</b> | <b>95% conf. Interval</b> |
| RV.Cs            | Lum. Cs | 1.491939          | 0.8653731        | 0.490          | [0.4786591-4.650243]      |
| RV.Cs            | ECs     | -                 | -                | -              | -                         |
| RV.Cs            | Ocy     | 11.02093          | 6.178996         | 0.000          | [3.672681-33.07143]       |
| RV.Cs            | Lum.Cs  | 0.5544842         | 0.401298         | 0.415          | [0.1342293-2.290504]      |
| RV.Cs            | ECs     | -                 | -                | -              | -                         |
| RV.Cs            | Ocy     | 3.058941          | 1.607959         | 0.033          | [1.091766-8.570626]       |
| RV.Cs            | OBs     | 6.345376          | 3.328076         | 0.000          | [2.269928-17.73792]       |
| RV.Cs            | BLCs    | 1.135672          | 0.6557492        | 0.826          | [0.366235-3.521647]       |
| Lum.Cs           | ECs     | -                 | -                | -              | -                         |
| Lum.Cs           | Ocy     | 7.37322           | 2.543703         | 0.000          | [3.749724-14.49823]       |
| Lum.Cs           | Lum.Cs  | 0.3700772         | 0.2134806        | 0.085          | [0.1194739-1.146335]      |
| Lum.Cs           | ECs     | -                 | -                | -              | -                         |
| Lum.Cs           | Ocy     | 2.038295          | 0.5867853        | 0.013          | [1.159372-3.583533]       |
| Lum.Cs           | OBs     | 4.252818          | 1.219919         | 0.000          | [2.423874-7.461801]       |
| Lum.Cs           | BLCs    | 0.7657763         | 0.2838038        | 0.471          | [0.3703725-1.583307]      |
| ECs              | Ocy     | -                 | -                | -              | -                         |
| ECs              | Lum.Cs  | -                 | -                | -              | -                         |
| ECs              | ECs     | -                 | -                | -              | -                         |
| ECs              | Ocy     | -                 | -                | -              | -                         |
| ECs              | OBs     | -                 | -                | -              | -                         |
| ECs              | BLCs    | -                 | -                | -              | -                         |
| Ocy              | Lum.Cs  | 0.0479868         | 0.0268269        | 0.000          | [0.0160421-0.1435435]     |
| Ocy              | ECs     | -                 | -                | -              | -                         |
| Ocy              | Ocy     | 0.2710953         | 0.066285         | 0.000          | [0.1678791-0.4377716]     |
| Ocy              | OBs     | 0.5662004         | 0.1390795        | 0.021          | [0.3498517-0.9163394]     |
| Ocy              | BLCs    | 0.1039066         | 0.0350414        | 0.000          | [0.0536519-0.2012341]     |
| Lum.Cs           | ECs     | -                 | -                | -              | -                         |
| Lum.Cs           | Ocy     | 5.512661          | 2.877694         | 0.001          | [1.981623-15.33563]       |
| Lum.Cs           | OBs     | 11.52593          | 6.005605         | 0.000          | [4.151032-32.00339]       |
| Lum.Cs           | BLCs    | 2.087785          | 1.202795         | 0.201          | [0.6749936-6.45761]       |
| ECs              | Ocy     | -                 | -                | -              | -                         |
| ECs              | OBs     | -                 | -                | -              | -                         |
| ECs              | BLCs    | -                 | -                | -              | -                         |
| Ocy              | OBs     | 2.098781          | 0.3189276        | 0.000          | [1.558188-2.826926]       |
| Ocy              | BLCs    | 0.3873222         | 0.1095315        | 0.001          | [0.2225152-0.6741944]     |
| OBs              | BLCs    | 0.1375931         | 0.0377186        | 0.000          | [0.0803999-0.2354712]     |
