# Supplementary material for: Mapping RANKL- and OPG-expressing cells in bone tissue: the bone surface cells as activators of osteoclastogenesis and promoters of the denosumab rebound effect
Source: PubMed Central journal article supplement (PMC11489716; doi:10.1038/s41413-024-00362-4), 2024-10-18

Figure S1

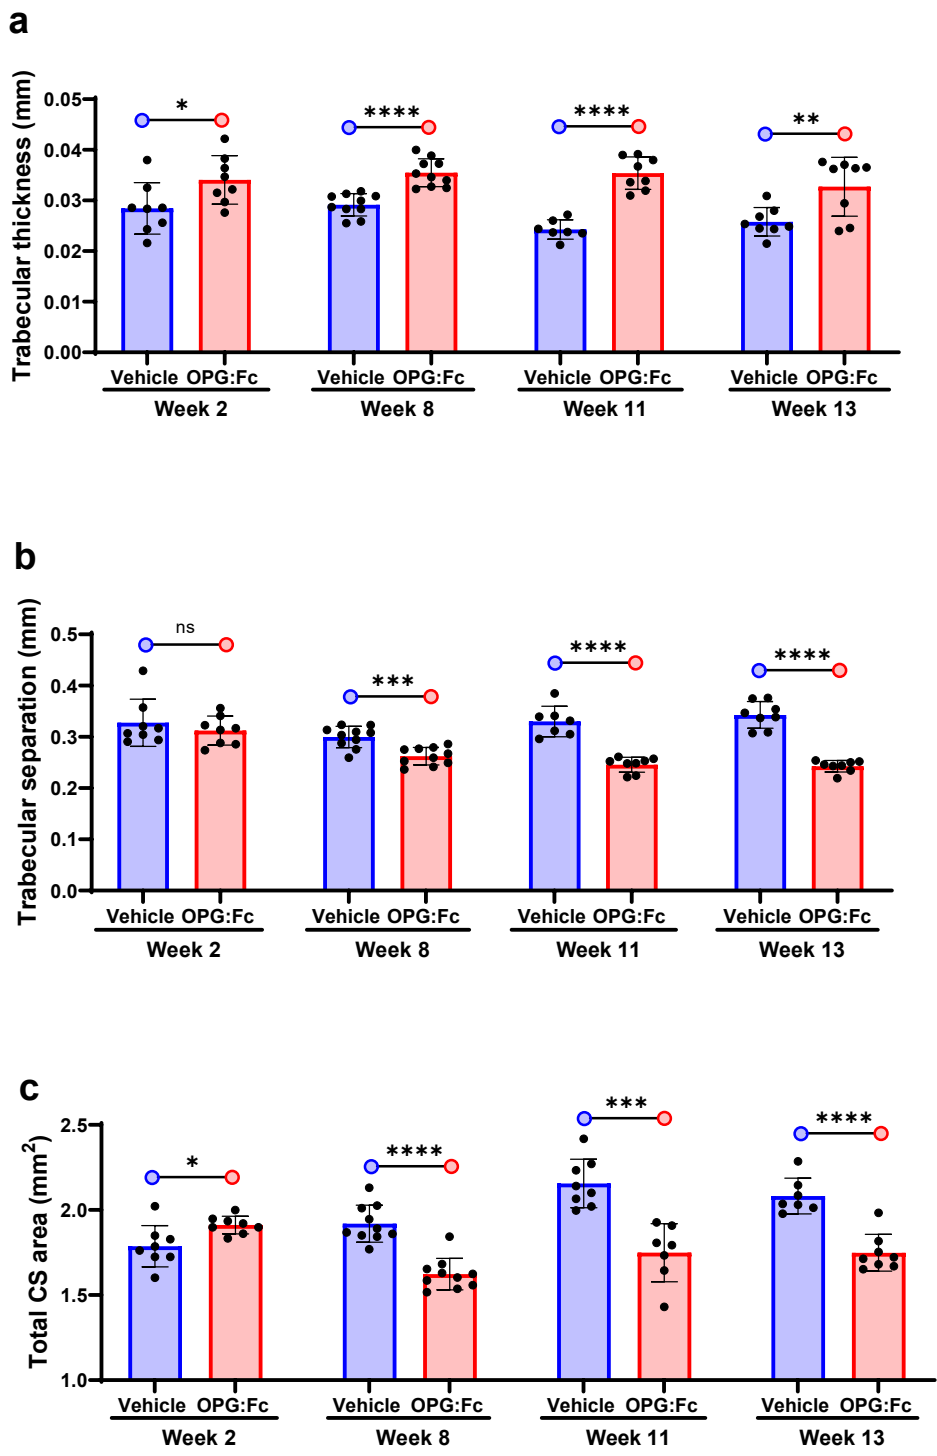

Supplement: 41413_2024_362_MOESM3_ESM.pdf [file 41413_2024_362_MOESM3_ESM.pdf]
